# Supplementary material
Source: publisher figshare collection journal article supplement (https://acs.figshare.com/ndownloader/files/10975427)
Supplement: Supplementary file 1 [file 10975427]

 
data_Kate37_CCDC_970102
  
_audit_creation_method            SHELXL-97 
_chemical_name_systematic 
; 
 ? 
; 
_chemical_name_common             ? 
_chemical_melting_point           ? 
_chemical_formula_moiety          
 'C18 H19 N O7'  
_chemical_formula_sum 
 'C18 H19 N O7' 
_chemical_formula_weight          361.34 
  
loop_ 
 _atom_type_symbol 
 _atom_type_description 
 _atom_type_scat_dispersion_real 
 _atom_type_scat_dispersion_imag 
 _atom_type_scat_source 
 'C'  'C'   0.0033   0.0016 
 'International Tables Vol C Tables 4.2.6.8 and 6.1.1.4' 
 'H'  'H'   0.0000   0.0000 
 'International Tables Vol C Tables 4.2.6.8 and 6.1.1.4' 
 'N'  'N'   0.0061   0.0033 
 'International Tables Vol C Tables 4.2.6.8 and 6.1.1.4' 
 'O'  'O'   0.0106   0.0060 
 'International Tables Vol C Tables 4.2.6.8 and 6.1.1.4' 
  
_symmetry_cell_setting            Orthorhombic 
_symmetry_space_group_name_H-M    'P 21 21 21'
_symmetry_space_group_name_Hall   'P 2ac 2ab' 
  
loop_ 
 _symmetry_equiv_pos_as_xyz 
 'x, y, z' 
 '-x+1/2, -y, z+1/2' 
 '-x, y+1/2, -z+1/2' 
 'x+1/2, -y+1/2, -z' 
  
_cell_length_a                    8.7586(4) 
_cell_length_b                    10.9593(5) 
_cell_length_c                    16.2878(7) 
_cell_angle_alpha                 90.00 
_cell_angle_beta                  90.00 
_cell_angle_gamma                 90.00 
_cell_volume                      1563.44(12) 
_cell_formula_units_Z             4 
_cell_measurement_temperature     120(2) 
_cell_measurement_reflns_used     5439 
_cell_measurement_theta_min       2.24 
_cell_measurement_theta_max       32.35 
  
_exptl_crystal_description        prism 
_exptl_crystal_colour             colourless 
_exptl_crystal_size_max           0.30 
_exptl_crystal_size_mid           0.20 
_exptl_crystal_size_min           0.20 
_exptl_crystal_density_meas       ? 
_exptl_crystal_density_diffrn     1.535 
_exptl_crystal_density_method     'not measured' 
_exptl_crystal_F_000              760 
_exptl_absorpt_coefficient_mu     0.119 
_exptl_absorpt_correction_type    'multi-scan' 
_exptl_absorpt_correction_T_min   0.965 
_exptl_absorpt_correction_T_max   0.977 
_exptl_absorpt_process_details    'SADABS (Bruker, 2003)' 
  
_exptl_special_details 
; 
 ? 
; 
  
_diffrn_ambient_temperature       120(2) 
_diffrn_radiation_wavelength      0.71073 
_diffrn_radiation_type            MoK\a 
_diffrn_radiation_source          'fine-focus sealed tube' 
_diffrn_radiation_monochromator   graphite 
_diffrn_measurement_device_type   'Bruker APEX-II CCD' 
_diffrn_measurement_method        '\f and \w scans' 
_diffrn_detector_area_resol_mean  ? 
_diffrn_reflns_number             20849 
_diffrn_reflns_av_R_equivalents   0.0458 
_diffrn_reflns_av_sigmaI/netI     0.0357 
_diffrn_reflns_limit_h_min        -12 
_diffrn_reflns_limit_h_max        12 
_diffrn_reflns_limit_k_min        -15 
_diffrn_reflns_limit_k_max        15 
_diffrn_reflns_limit_l_min        -22 
_diffrn_reflns_limit_l_max        22 
_diffrn_reflns_theta_min          2.24 
_diffrn_reflns_theta_max          30.00 
_reflns_number_total              4567 
_reflns_number_gt                 4147 
_reflns_threshold_expression      'I>2\s(I)' 
  
_computing_data_collection        'APEX2   (Bruker, 2005)'             
_computing_cell_refinement        'SAINT   (Bruker, 2001)' 
_computing_data_reduction         'SAINT   (Bruker, 2001)' 
_computing_structure_solution     'SHELXTL (Sheldrick, 2008)'        
_computing_structure_refinement   'SHELXTL (Sheldrick, 2008)'        
_computing_molecular_graphics     'SHELXTL (Sheldrick, 2008)'        
_computing_publication_material   'SHELXTL (Sheldrick, 2008)'        
  
_refine_special_details 
; 
 Refinement of F^2^ against ALL reflections.  The weighted R-factor wR and 
 goodness of fit S are based on F^2^, conventional R-factors R are based 
 on F, with F set to zero for negative F^2^. The threshold expression of 
 F^2^ > 2sigma(F^2^) is used only for calculating R-factors(gt) etc. and is 
 not relevant to the choice of reflections for refinement.  R-factors based 
 on F^2^ are statistically about twice as large as those based on F, and R- 
 factors based on ALL data will be even larger. 
; 
  
_refine_ls_structure_factor_coef  Fsqd 
_refine_ls_matrix_type            full 
_refine_ls_weighting_scheme       calc 
_refine_ls_weighting_details 
 'calc w=1/[\s^2^(Fo^2^)+(0.0518P)^2^+0.0265P] where P=(Fo^2^+2Fc^2^)/3' 
_atom_sites_solution_primary      direct 
_atom_sites_solution_secondary    difmap 
_atom_sites_solution_hydrogens    geom 
_refine_ls_hydrogen_treatment     constr 
_refine_ls_extinction_method      none
_refine_ls_extinction_coef        ? 
_chemical_absolute_configuration  unk
_refine_ls_number_reflns          4567 
_refine_ls_number_parameters      238 
_refine_ls_number_restraints      0 
_refine_ls_R_factor_all           0.0407 
_refine_ls_R_factor_gt            0.0346 
_refine_ls_wR_factor_ref          0.0876 
_refine_ls_wR_factor_gt           0.0846 
_refine_ls_goodness_of_fit_ref    1.032 
_refine_ls_restrained_S_all       1.032 
_refine_ls_shift/su_max           0.000 
_refine_ls_shift/su_mean          0.000 
  
loop_ 
 _atom_site_label 
 _atom_site_type_symbol 
 _atom_site_fract_x 
 _atom_site_fract_y 
 _atom_site_fract_z 
 _atom_site_U_iso_or_equiv 
 _atom_site_adp_type 
 _atom_site_occupancy 
 _atom_site_symmetry_multiplicity 
 _atom_site_calc_flag 
 _atom_site_refinement_flags 
 _atom_site_disorder_assembly 
 _atom_site_disorder_group 
C1 C 0.57921(15) 0.58091(13) 0.63991(8) 0.0148(2) Uani 1 1 d . . . 
H1A H 0.4969 0.6374 0.6229 0.018 Uiso 1 1 calc R . . 
H1B H 0.5408 0.4964 0.6342 0.018 Uiso 1 1 calc R . . 
N2 N 0.62028(12) 0.60421(10) 0.72577(7) 0.0138(2) Uani 1 1 d . . . 
C3 C 0.74139(14) 0.52502(12) 0.75793(8) 0.0137(2) Uani 1 1 d . . . 
H3A H 0.7086 0.4387 0.7542 0.016 Uiso 1 1 calc R . . 
H3B H 0.7596 0.5444 0.8165 0.016 Uiso 1 1 calc R . . 
C3A C 0.88793(14) 0.54231(11) 0.70993(7) 0.0122(2) Uani 1 1 d . . . 
C4 C 1.03327(14) 0.47269(13) 0.73240(8) 0.0151(2) Uani 1 1 d . . . 
H4 H 1.0408 0.3979 0.7616 0.018 Uiso 1 1 calc R . . 
C5 C 1.14710(15) 0.53975(13) 0.70211(8) 0.0160(3) Uani 1 1 d . . . 
H5 H 1.2532 0.5221 0.7049 0.019 Uiso 1 1 calc R . . 
C6 C 1.07250(15) 0.65050(12) 0.66199(8) 0.0140(2) Uani 1 1 d . . . 
H6 H 1.1399 0.7238 0.6571 0.017 Uiso 1 1 calc R . . 
C6A C 0.99732(14) 0.60677(12) 0.57863(8) 0.0116(2) Uani 1 1 d . . . 
C7 C 0.89734(14) 0.70699(12) 0.53339(8) 0.0130(2) Uani 1 1 d . . . 
H7 H 0.9533 0.7840 0.5199 0.016 Uiso 1 1 calc R . . 
C8 C 0.81622(15) 0.64776(12) 0.46037(8) 0.0150(2) Uani 1 1 d . . . 
H8 H 0.8406 0.6568 0.4039 0.018 Uiso 1 1 calc R . . 
C9 C 0.70426(15) 0.58077(12) 0.49255(8) 0.0140(3) Uani 1 1 d . . . 
H9 H 0.6318 0.5322 0.4640 0.017 Uiso 1 1 calc R . . 
C9A C 0.71757(14) 0.59881(12) 0.58514(8) 0.0120(2) Uani 1 1 d . . . 
C9B C 0.86420(13) 0.52591(12) 0.61355(7) 0.0106(2) Uani 1 1 d . . . 
O10 O 0.94119(11) 0.66638(9) 0.71421(5) 0.01342(19) Uani 1 1 d . . . 
O11 O 0.77172(10) 0.72226(8) 0.58889(6) 0.01334(18) Uani 1 1 d . . . 
C12 C 0.57060(16) 0.70898(13) 0.76201(8) 0.0179(3) Uani 1 1 d . . . 
O12 O 0.47982(13) 0.77803(11) 0.72791(7) 0.0271(2) Uani 1 1 d . . . 
C13 C 0.62813(19) 0.73733(14) 0.84758(9) 0.0234(3) Uani 1 1 d . . . 
H13A H 0.5679 0.8041 0.8711 0.035 Uiso 1 1 calc R . . 
H13B H 0.7357 0.7616 0.8448 0.035 Uiso 1 1 calc R . . 
H13C H 0.6181 0.6647 0.8822 0.035 Uiso 1 1 calc R . . 
C14 C 1.12004(14) 0.55346(11) 0.52266(8) 0.0131(2) Uani 1 1 d . . . 
O14 O 1.25341(10) 0.54677(9) 0.54090(6) 0.0186(2) Uani 1 1 d . . . 
O15 O 1.06422(10) 0.52242(9) 0.44928(5) 0.01607(19) Uani 1 1 d . . . 
C15 C 1.17211(16) 0.48885(14) 0.38604(8) 0.0189(3) Uani 1 1 d . . . 
H15A H 1.1289 0.5078 0.3320 0.028 Uiso 1 1 calc R . . 
H15B H 1.1935 0.4012 0.3895 0.028 Uiso 1 1 calc R . . 
H15C H 1.2670 0.5348 0.3937 0.028 Uiso 1 1 calc R . . 
C16 C 0.85400(14) 0.39184(12) 0.59136(8) 0.0122(2) Uani 1 1 d . . . 
O16 O 0.73519(11) 0.33643(10) 0.59023(7) 0.0231(2) Uani 1 1 d . . . 
O17 O 0.98926(11) 0.34139(9) 0.57554(6) 0.0180(2) Uani 1 1 d . . . 
C17 C 0.98780(17) 0.21087(12) 0.56131(9) 0.0196(3) Uani 1 1 d . . . 
H17A H 1.0827 0.1866 0.5339 0.029 Uiso 1 1 calc R . . 
H17B H 0.9005 0.1897 0.5264 0.029 Uiso 1 1 calc R . . 
H17C H 0.9792 0.1681 0.6139 0.029 Uiso 1 1 calc R . . 
  
loop_ 
 _atom_site_aniso_label 
 _atom_site_aniso_U_11 
 _atom_site_aniso_U_22 
 _atom_site_aniso_U_33 
 _atom_site_aniso_U_23 
 _atom_site_aniso_U_13 
 _atom_site_aniso_U_12 
C1 0.0113(5) 0.0183(6) 0.0149(6) 0.0005(5) 0.0003(5) -0.0005(5) 
N2 0.0115(5) 0.0165(5) 0.0135(5) 0.0015(4) 0.0026(4) 0.0025(4) 
C3 0.0138(5) 0.0134(6) 0.0138(5) 0.0029(5) 0.0016(5) 0.0014(5) 
C3A 0.0136(5) 0.0117(6) 0.0112(5) 0.0015(4) -0.0008(4) -0.0013(5) 
C4 0.0143(6) 0.0178(6) 0.0133(6) 0.0009(5) -0.0027(4) 0.0025(5) 
C5 0.0130(6) 0.0226(7) 0.0124(5) 0.0003(5) -0.0028(5) 0.0007(5) 
C6 0.0123(6) 0.0163(6) 0.0136(6) -0.0006(5) 0.0007(5) -0.0040(5) 
C6A 0.0101(5) 0.0122(5) 0.0125(6) 0.0004(4) -0.0003(4) -0.0005(4) 
C7 0.0115(5) 0.0131(6) 0.0143(6) 0.0025(5) 0.0010(5) 0.0009(5) 
C8 0.0144(6) 0.0177(6) 0.0128(5) 0.0016(5) -0.0012(5) 0.0043(5) 
C9 0.0127(6) 0.0151(6) 0.0143(6) -0.0009(5) -0.0029(5) 0.0029(5) 
C9A 0.0112(5) 0.0119(5) 0.0128(6) 0.0007(5) -0.0002(5) 0.0007(5) 
C9B 0.0092(5) 0.0114(5) 0.0113(5) 0.0002(4) -0.0004(4) 0.0001(5) 
O10 0.0149(4) 0.0123(4) 0.0131(4) -0.0019(3) 0.0015(4) -0.0027(4) 
O11 0.0130(4) 0.0114(4) 0.0156(4) 0.0006(4) 0.0027(4) 0.0003(3) 
C12 0.0171(6) 0.0202(6) 0.0164(6) 0.0005(5) 0.0039(5) 0.0017(5) 
O12 0.0316(6) 0.0271(6) 0.0225(5) -0.0007(5) 0.0004(5) 0.0147(5) 
C13 0.0285(7) 0.0218(7) 0.0199(7) -0.0042(5) -0.0008(6) 0.0051(6) 
C14 0.0139(6) 0.0119(5) 0.0136(6) 0.0015(4) 0.0022(5) -0.0008(5) 
O14 0.0121(4) 0.0255(5) 0.0181(4) 0.0009(4) -0.0001(4) 0.0006(4) 
O15 0.0131(4) 0.0230(5) 0.0122(4) -0.0037(4) 0.0011(3) 0.0019(4) 
C15 0.0186(6) 0.0240(7) 0.0143(6) -0.0037(5) 0.0041(5) 0.0044(6) 
C16 0.0134(5) 0.0129(6) 0.0104(5) 0.0000(4) -0.0006(5) 0.0006(5) 
O16 0.0152(5) 0.0167(5) 0.0373(6) -0.0048(5) 0.0003(5) -0.0040(4) 
O17 0.0153(4) 0.0116(4) 0.0270(5) -0.0023(4) 0.0045(4) 0.0018(4) 
C17 0.0227(7) 0.0118(6) 0.0242(7) -0.0022(5) 0.0042(6) 0.0036(5) 
  
_geom_special_details 
; 
 All esds (except the esd in the dihedral angle between two l.s. planes) 
 are estimated using the full covariance matrix.  The cell esds are taken 
 into account individually in the estimation of esds in distances, angles 
 and torsion angles; correlations between esds in cell parameters are only 
 used when they are defined by crystal symmetry.  An approximate (isotropic) 
 treatment of cell esds is used for estimating esds involving l.s. planes. 
; 
  
loop_ 
 _geom_bond_atom_site_label_1 
 _geom_bond_atom_site_label_2 
 _geom_bond_distance 
 _geom_bond_site_symmetry_2 
 _geom_bond_publ_flag 
C1 N2 1.4665(16) . ? 
C1 C9A 1.5175(18) . ? 
C1 H1A 0.9900 . ? 
C1 H1B 0.9900 . ? 
N2 C12 1.3624(18) . ? 
N2 C3 1.4673(16) . ? 
C3 C3A 1.5148(17) . ? 
C3 H3A 0.9900 . ? 
C3 H3B 0.9900 . ? 
C3A O10 1.4392(15) . ? 
C3A C4 1.5286(18) . ? 
C3A C9B 1.5937(17) . ? 
C4 C5 1.3333(19) . ? 
C4 H4 0.9500 . ? 
C5 C6 1.5254(19) . ? 
C5 H5 0.9500 . ? 
C6 O10 1.4409(16) . ? 
C6 C6A 1.5833(18) . ? 
C6 H6 1.0000 . ? 
C6A C14 1.5256(17) . ? 
C6A C9B 1.5711(17) . ? 
C6A C7 1.5863(17) . ? 
C7 O11 1.4338(15) . ? 
C7 C8 1.5299(19) . ? 
C7 H7 1.0000 . ? 
C8 C9 1.3324(19) . ? 
C8 H8 0.9500 . ? 
C9 C9A 1.5255(18) . ? 
C9 H9 0.9500 . ? 
C9A O11 1.4350(16) . ? 
C9A C9B 1.5816(17) . ? 
C9B C16 1.5157(18) . ? 
C12 O12 1.2301(18) . ? 
C12 C13 1.514(2) . ? 
C13 H13A 0.9800 . ? 
C13 H13B 0.9800 . ? 
C13 H13C 0.9800 . ? 
C14 O14 1.2076(15) . ? 
C14 O15 1.3355(15) . ? 
O15 C15 1.4453(16) . ? 
C15 H15A 0.9800 . ? 
C15 H15B 0.9800 . ? 
C15 H15C 0.9800 . ? 
C16 O16 1.2050(15) . ? 
C16 O17 1.3326(15) . ? 
O17 C17 1.4492(17) . ? 
C17 H17A 0.9800 . ? 
C17 H17B 0.9800 . ? 
C17 H17C 0.9800 . ? 
  
loop_ 
 _geom_angle_atom_site_label_1 
 _geom_angle_atom_site_label_2 
 _geom_angle_atom_site_label_3 
 _geom_angle 
 _geom_angle_site_symmetry_1 
 _geom_angle_site_symmetry_3 
 _geom_angle_publ_flag 
N2 C1 C9A 110.01(10) . . ? 
N2 C1 H1A 109.7 . . ? 
C9A C1 H1A 109.7 . . ? 
N2 C1 H1B 109.7 . . ? 
C9A C1 H1B 109.7 . . ? 
H1A C1 H1B 108.2 . . ? 
C12 N2 C1 118.79(11) . . ? 
C12 N2 C3 125.08(11) . . ? 
C1 N2 C3 114.51(10) . . ? 
N2 C3 C3A 110.75(10) . . ? 
N2 C3 H3A 109.5 . . ? 
C3A C3 H3A 109.5 . . ? 
N2 C3 H3B 109.5 . . ? 
C3A C3 H3B 109.5 . . ? 
H3A C3 H3B 108.1 . . ? 
O10 C3A C3 111.58(10) . . ? 
O10 C3A C4 100.95(10) . . ? 
C3 C3A C4 121.31(10) . . ? 
O10 C3A C9B 101.33(9) . . ? 
C3 C3A C9B 112.57(10) . . ? 
C4 C3A C9B 106.75(10) . . ? 
C5 C4 C3A 105.01(11) . . ? 
C5 C4 H4 127.5 . . ? 
C3A C4 H4 127.5 . . ? 
C4 C5 C6 106.07(11) . . ? 
C4 C5 H5 127.0 . . ? 
C6 C5 H5 127.0 . . ? 
O10 C6 C5 100.67(10) . . ? 
O10 C6 C6A 102.17(10) . . ? 
C5 C6 C6A 107.73(10) . . ? 
O10 C6 H6 114.9 . . ? 
C5 C6 H6 114.9 . . ? 
C6A C6 H6 114.9 . . ? 
C14 C6A C9B 121.55(10) . . ? 
C14 C6A C6 109.59(10) . . ? 
C9B C6A C6 99.73(9) . . ? 
C14 C6A C7 112.12(10) . . ? 
C9B C6A C7 98.57(9) . . ? 
C6 C6A C7 114.73(10) . . ? 
O11 C7 C8 100.56(10) . . ? 
O11 C7 C6A 102.21(9) . . ? 
C8 C7 C6A 108.88(10) . . ? 
O11 C7 H7 114.6 . . ? 
C8 C7 H7 114.6 . . ? 
C6A C7 H7 114.6 . . ? 
C9 C8 C7 105.66(12) . . ? 
C9 C8 H8 127.2 . . ? 
C7 C8 H8 127.2 . . ? 
C8 C9 C9A 105.14(12) . . ? 
C8 C9 H9 127.4 . . ? 
C9A C9 H9 127.4 . . ? 
O11 C9A C1 111.15(10) . . ? 
O11 C9A C9 100.92(10) . . ? 
C1 C9A C9 120.22(11) . . ? 
O11 C9A C9B 101.27(9) . . ? 
C1 C9A C9B 114.28(10) . . ? 
C9 C9A C9B 106.61(10) . . ? 
C16 C9B C6A 120.28(10) . . ? 
C16 C9B C9A 111.84(10) . . ? 
C6A C9B C9A 102.23(10) . . ? 
C16 C9B C3A 110.60(10) . . ? 
C6A C9B C3A 101.32(9) . . ? 
C9A C9B C3A 109.70(10) . . ? 
C3A O10 C6 96.67(9) . . ? 
C7 O11 C9A 96.71(9) . . ? 
O12 C12 N2 121.96(13) . . ? 
O12 C12 C13 120.30(13) . . ? 
N2 C12 C13 117.73(12) . . ? 
C12 C13 H13A 109.5 . . ? 
C12 C13 H13B 109.5 . . ? 
H13A C13 H13B 109.5 . . ? 
C12 C13 H13C 109.5 . . ? 
H13A C13 H13C 109.5 . . ? 
H13B C13 H13C 109.5 . . ? 
O14 C14 O15 123.97(12) . . ? 
O14 C14 C6A 123.91(11) . . ? 
O15 C14 C6A 111.99(10) . . ? 
C14 O15 C15 117.60(10) . . ? 
O15 C15 H15A 109.5 . . ? 
O15 C15 H15B 109.5 . . ? 
H15A C15 H15B 109.5 . . ? 
O15 C15 H15C 109.5 . . ? 
H15A C15 H15C 109.5 . . ? 
H15B C15 H15C 109.5 . . ? 
O16 C16 O17 123.76(12) . . ? 
O16 C16 C9B 122.90(11) . . ? 
O17 C16 C9B 113.32(10) . . ? 
C16 O17 C17 115.63(11) . . ? 
O17 C17 H17A 109.5 . . ? 
O17 C17 H17B 109.5 . . ? 
H17A C17 H17B 109.5 . . ? 
O17 C17 H17C 109.5 . . ? 
H17A C17 H17C 109.5 . . ? 
H17B C17 H17C 109.5 . . ? 
  
loop_ 
 _geom_torsion_atom_site_label_1 
 _geom_torsion_atom_site_label_2 
 _geom_torsion_atom_site_label_3 
 _geom_torsion_atom_site_label_4 
 _geom_torsion 
 _geom_torsion_site_symmetry_1 
 _geom_torsion_site_symmetry_2 
 _geom_torsion_site_symmetry_3 
 _geom_torsion_site_symmetry_4 
 _geom_torsion_publ_flag 
C9A C1 N2 C12 106.66(13) . . . . ? 
C9A C1 N2 C3 -59.57(14) . . . . ? 
C12 N2 C3 C3A -104.01(14) . . . . ? 
C1 N2 C3 C3A 61.22(14) . . . . ? 
N2 C3 C3A O10 59.79(13) . . . . ? 
N2 C3 C3A C4 178.46(11) . . . . ? 
N2 C3 C3A C9B -53.37(14) . . . . ? 
O10 C3A C4 C5 -33.09(12) . . . . ? 
C3 C3A C4 C5 -156.88(12) . . . . ? 
C9B C3A C4 C5 72.41(12) . . . . ? 
C3A C4 C5 C6 0.53(13) . . . . ? 
C4 C5 C6 O10 32.10(13) . . . . ? 
C4 C5 C6 C6A -74.49(13) . . . . ? 
O10 C6 C6A C14 -165.24(10) . . . . ? 
C5 C6 C6A C14 -59.70(13) . . . . ? 
O10 C6 C6A C9B -36.60(11) . . . . ? 
C5 C6 C6A C9B 68.94(12) . . . . ? 
O10 C6 C6A C7 67.61(12) . . . . ? 
C5 C6 C6A C7 173.14(10) . . . . ? 
C14 C6A C7 O11 167.04(10) . . . . ? 
C9B C6A C7 O11 37.82(11) . . . . ? 
C6 C6A C7 O11 -67.10(12) . . . . ? 
C14 C6A C7 C8 61.25(13) . . . . ? 
C9B C6A C7 C8 -67.98(11) . . . . ? 
C6 C6A C7 C8 -172.90(10) . . . . ? 
O11 C7 C8 C9 -32.55(13) . . . . ? 
C6A C7 C8 C9 74.38(13) . . . . ? 
C7 C8 C9 C9A -0.22(13) . . . . ? 
N2 C1 C9A O11 -62.16(13) . . . . ? 
N2 C1 C9A C9 -179.57(11) . . . . ? 
N2 C1 C9A C9B 51.69(14) . . . . ? 
C8 C9 C9A O11 32.93(13) . . . . ? 
C8 C9 C9A C1 155.45(12) . . . . ? 
C8 C9 C9A C9B -72.45(13) . . . . ? 
C14 C6A C9B C16 -0.61(16) . . . . ? 
C6 C6A C9B C16 -120.91(11) . . . . ? 
C7 C6A C9B C16 122.02(11) . . . . ? 
C14 C6A C9B C9A -125.18(12) . . . . ? 
C6 C6A C9B C9A 114.52(10) . . . . ? 
C7 C6A C9B C9A -2.54(11) . . . . ? 
C14 C6A C9B C3A 121.55(11) . . . . ? 
C6 C6A C9B C3A 1.25(11) . . . . ? 
C7 C6A C9B C3A -115.82(10) . . . . ? 
O11 C9A C9B C16 -163.07(9) . . . . ? 
C1 C9A C9B C16 77.36(13) . . . . ? 
C9 C9A C9B C16 -57.94(13) . . . . ? 
O11 C9A C9B C6A -33.08(11) . . . . ? 
C1 C9A C9B C6A -152.65(11) . . . . ? 
C9 C9A C9B C6A 72.05(11) . . . . ? 
O11 C9A C9B C3A 73.83(11) . . . . ? 
C1 C9A C9B C3A -45.74(14) . . . . ? 
C9 C9A C9B C3A 178.96(10) . . . . ? 
O10 C3A C9B C16 162.92(10) . . . . ? 
C3 C3A C9B C16 -77.76(13) . . . . ? 
C4 C3A C9B C16 57.69(12) . . . . ? 
O10 C3A C9B C6A 34.28(11) . . . . ? 
C3 C3A C9B C6A 153.59(10) . . . . ? 
C4 C3A C9B C6A -70.95(12) . . . . ? 
O10 C3A C9B C9A -73.25(11) . . . . ? 
C3 C3A C9B C9A 46.06(13) . . . . ? 
C4 C3A C9B C9A -178.48(10) . . . . ? 
C3 C3A O10 C6 -178.18(10) . . . . ? 
C4 C3A O10 C6 51.60(10) . . . . ? 
C9B C3A O10 C6 -58.16(10) . . . . ? 
C5 C6 O10 C3A -51.05(11) . . . . ? 
C6A C6 O10 C3A 59.91(10) . . . . ? 
C8 C7 O11 C9A 51.48(10) . . . . ? 
C6A C7 O11 C9A -60.68(10) . . . . ? 
C1 C9A O11 C7 179.49(10) . . . . ? 
C9 C9A O11 C7 -51.89(10) . . . . ? 
C9B C9A O11 C7 57.70(10) . . . . ? 
C1 N2 C12 O12 7.7(2) . . . . ? 
C3 N2 C12 O12 172.35(13) . . . . ? 
C1 N2 C12 C13 -173.70(12) . . . . ? 
C3 N2 C12 C13 -9.04(19) . . . . ? 
C9B C6A C14 O14 -115.35(14) . . . . ? 
C6 C6A C14 O14 0.05(17) . . . . ? 
C7 C6A C14 O14 128.66(13) . . . . ? 
C9B C6A C14 O15 68.68(14) . . . . ? 
C6 C6A C14 O15 -175.92(10) . . . . ? 
C7 C6A C14 O15 -47.31(14) . . . . ? 
O14 C14 O15 C15 -5.50(19) . . . . ? 
C6A C14 O15 C15 170.46(11) . . . . ? 
C6A C9B C16 O16 -152.95(13) . . . . ? 
C9A C9B C16 O16 -33.07(17) . . . . ? 
C3A C9B C16 O16 89.52(15) . . . . ? 
C6A C9B C16 O17 28.72(16) . . . . ? 
C9A C9B C16 O17 148.61(11) . . . . ? 
C3A C9B C16 O17 -88.80(13) . . . . ? 
O16 C16 O17 C17 -3.71(19) . . . . ? 
C9B C16 O17 C17 174.60(11) . . . . ? 
  
_diffrn_measured_fraction_theta_max    1.000 
_diffrn_reflns_theta_full              30.00 
_diffrn_measured_fraction_theta_full   1.000 
_refine_diff_density_max    0.295 
_refine_diff_density_min   -0.197 
_refine_diff_density_rms    0.045 

_iucr_refine_instructions_details
;
TITL Kate37 in P2(1)2(1)2(1)
CELL 0.71073   8.7586  10.9593  16.2878  90.000  90.000  90.000
ZERR    4.00   0.0004   0.0005   0.0007   0.000   0.000   0.000
LATT -1
SYMM 0.5-X, -Y, 0.5+Z
SYMM -X, 0.5+Y, 0.5-Z
SYMM 0.5+X, 0.5-Y, -Z
SFAC C H N O
UNIT 72 76 4 28
TEMP -153.0
SIZE 0.200 0.200 0.300
 
L.S. 12
BOND $H
ACTA
CONF
 
WGHT    0.051800    0.026500
FVAR       0.22954
C1    1    0.579210    0.580913    0.639909    11.00000    0.01134    0.01831 =
         0.01489    0.00048    0.00029   -0.00045
AFIX  23
H1A   2    0.496885    0.637422    0.622911    11.00000   -1.20000
H1B   2    0.540841    0.496373    0.634160    11.00000   -1.20000
AFIX   0
N2    3    0.620280    0.604214    0.725773    11.00000    0.01152    0.01646 =
         0.01345    0.00155    0.00263    0.00249
C3    1    0.741390    0.525022    0.757934    11.00000    0.01379    0.01344 =
         0.01377    0.00286    0.00162    0.00142
AFIX  23
H3A   2    0.708625    0.438741    0.754241    11.00000   -1.20000
H3B   2    0.759627    0.544396    0.816486    11.00000   -1.20000
AFIX   0
C3A   1    0.887926    0.542311    0.709929    11.00000    0.01360    0.01169 =
         0.01123    0.00145   -0.00079   -0.00132
C4    1    1.033271    0.472692    0.732398    11.00000    0.01434    0.01781 =
         0.01328    0.00091   -0.00274    0.00250
AFIX  43
H4    2    1.040845    0.397898    0.761599    11.00000   -1.20000
AFIX   0
C5    1    1.147104    0.539752    0.702107    11.00000    0.01302    0.02262 =
         0.01245    0.00027   -0.00277    0.00074
AFIX  43
H5    2    1.253175    0.522134    0.704932    11.00000   -1.20000
AFIX   0
C6    1    1.072503    0.650502    0.661993    11.00000    0.01225    0.01627 =
         0.01355   -0.00062    0.00065   -0.00395
AFIX  13
H6    2    1.139858    0.723823    0.657127    11.00000   -1.20000
AFIX   0
C6A   1    0.997325    0.606767    0.578629    11.00000    0.01012    0.01224 =
         0.01253    0.00038   -0.00032   -0.00054
C7    1    0.897340    0.706994    0.533387    11.00000    0.01147    0.01310 =
         0.01430    0.00252    0.00100    0.00089
AFIX  13
H7    2    0.953279    0.783991    0.519950    11.00000   -1.20000
AFIX   0
C8    1    0.816218    0.647756    0.460373    11.00000    0.01445    0.01767 =
         0.01281    0.00158   -0.00117    0.00429
AFIX  43
H8    2    0.840593    0.656840    0.403869    11.00000   -1.20000
AFIX   0
C9    1    0.704255    0.580769    0.492551    11.00000    0.01271    0.01510 =
         0.01433   -0.00088   -0.00288    0.00287
AFIX  43
H9    2    0.631759    0.532237    0.463989    11.00000   -1.20000
AFIX   0
C9A   1    0.717572    0.598805    0.585144    11.00000    0.01124    0.01190 =
         0.01275    0.00069   -0.00020    0.00074
C9B   1    0.864198    0.525912    0.613547    11.00000    0.00918    0.01140 =
         0.01130    0.00021   -0.00045    0.00009
O10   4    0.941193    0.666380    0.714206    11.00000    0.01487    0.01232 =
         0.01306   -0.00188    0.00150   -0.00266
O11   4    0.771724    0.722260    0.588888    11.00000    0.01302    0.01138 =
         0.01562    0.00058    0.00269    0.00025
C12   1    0.570598    0.708984    0.762011    11.00000    0.01706    0.02016 =
         0.01642    0.00048    0.00392    0.00167
O12   4    0.479822    0.778027    0.727914    11.00000    0.03165    0.02707 =
         0.02252   -0.00069    0.00035    0.01473
C13   1    0.628132    0.737329    0.847583    11.00000    0.02852    0.02183 =
         0.01994   -0.00418   -0.00083    0.00513
AFIX 137
H13A  2    0.567850    0.804079    0.871083    11.00000   -1.50000
H13B  2    0.735701    0.761594    0.844821    11.00000   -1.50000
H13C  2    0.618079    0.664660    0.882226    11.00000   -1.50000
AFIX   0
C14   1    1.120036    0.553460    0.522664    11.00000    0.01388    0.01190 =
         0.01359    0.00153    0.00217   -0.00082
O14   4    1.253413    0.546768    0.540895    11.00000    0.01209    0.02552 =
         0.01812    0.00088   -0.00008    0.00061
O15   4    1.064224    0.522417    0.449277    11.00000    0.01309    0.02297 =
         0.01216   -0.00371    0.00107    0.00195
C15   1    1.172108    0.488847    0.386041    11.00000    0.01860    0.02395 =
         0.01426   -0.00371    0.00406    0.00444
AFIX 137
H15A  2    1.128880    0.507762    0.332025    11.00000   -1.50000
H15B  2    1.193546    0.401235    0.389531    11.00000   -1.50000
H15C  2    1.267047    0.534781    0.393694    11.00000   -1.50000
AFIX   0
C16   1    0.853997    0.391841    0.591361    11.00000    0.01342    0.01295 =
         0.01037   -0.00005   -0.00057    0.00056
O16   4    0.735192    0.336427    0.590230    11.00000    0.01522    0.01667 =
         0.03733   -0.00485    0.00031   -0.00399
O17   4    0.989263    0.341391    0.575538    11.00000    0.01528    0.01159 =
         0.02705   -0.00225    0.00450    0.00175
C17   1    0.987802    0.210867    0.561310    11.00000    0.02271    0.01182 =
         0.02418   -0.00224    0.00421    0.00356
AFIX 137
H17A  2    1.082689    0.186584    0.533929    11.00000   -1.50000
H17B  2    0.900545    0.189688    0.526446    11.00000   -1.50000
H17C  2    0.979183    0.168061    0.613932    11.00000   -1.50000
 
HKLF 4
 
REM  Kate37 in P2(1)2(1)2(1)
REM R1 = 0.0346 for   4147 Fo > 4sig(Fo)  and  0.0407 for all   4567 data
REM    238 parameters refined using      0 restraints
 
END  
     
WGHT      0.0518      0.0265 
REM Highest difference peak  0.295,  deepest hole -0.197,  1-sigma level  0.045
Q1    1   0.8143  0.5391  0.7342  11.00000  0.05    0.30
Q2    1   0.6413  0.5989  0.6085  11.00000  0.05    0.28
Q3    1   1.0628  0.5819  0.5503  11.00000  0.05    0.28
Q4    1   0.8575  0.4590  0.6016  11.00000  0.05    0.27
Q5    1   0.8758  0.5315  0.6633  11.00000  0.05    0.27
Q6    1   0.9569  0.5035  0.7259  11.00000  0.05    0.26
Q7    1   0.9195  0.5707  0.5932  11.00000  0.05    0.25
Q8    1   0.9586  0.6589  0.5554  11.00000  0.05    0.24
Q9    1   0.7383  0.6400  0.4756  11.00000  0.05    0.24
Q10   1   0.9874  0.2745  0.5648  11.00000  0.05    0.24
Q11   1   0.6189  0.7192  0.8004  11.00000  0.05    0.23
Q12   1   0.7973  0.5620  0.5981  11.00000  0.05    0.23
Q13   1   1.0984  0.5203  0.7386  11.00000  0.05    0.22
Q14   1   1.0332  0.6353  0.6155  11.00000  0.05    0.21
Q15   1   1.0802  0.4984  0.6926  11.00000  0.05    0.21
Q16   1   1.0878  0.5547  0.4824  11.00000  0.05    0.21
Q17   1   0.5747  0.6397  0.7515  11.00000  0.05    0.21
Q18   1   0.6956  0.5744  0.5401  11.00000  0.05    0.20
Q19   1   0.6859  0.5704  0.7392  11.00000  0.05    0.19
Q20   1   0.7943  0.3549  0.6164  11.00000  0.05    0.19
;

_publ_section_references                                            
                                                                    
;                                                                   
Bruker (2001). SAINT, v. 6.2. Data Reduction and Correction     
Program, Bruker AXS, Madison, Wisconsin, USA.                       
                                                                    
Bruker (2003). SADABS, v. 2.03, Bruker/Siemens Area Detector
Absorption Correction Program, Bruker AXS, Madison, Wisconsin, USA. 
                                                                    
Bruker (2005). APEX2 software package, v. 1.27. Bruker Molecular    
Analysis Research Tool, Bruker AXS, Madison, Wisconsin, USA.        
                                                                    
Sheldrick G.M. (2008). Acta Cryst. A64, 112-122.                    
;
#=============================================================================
#                         END of CIF
#=============================================================================
#    It is useful and  STRONGLY RECOMMENDED  to add a line at the end of
#     your CIF such as:-
#    #       END of CIF  
#    so that you and all subsequent readers know that this IS the end of the 
#    CIF and that it has been correctly transmitted in its entirety.
#=============================================================================
#    END of SHELXL97-2004 insert template
#=============================================================================
